# Supplementary material for: Niche-induced extramedullary hematopoiesis in the spleen is regulated by the transcription factor Tlx1
Source: PubMed Central journal article supplement (PMC5974313; doi:10.1038/s41598-018-26693-x), 2018-05-29
Supplement: 41598_2018_26693_MOESM1_ESM.pdf [file 41598_2018_26693_MOESM1_ESM.pdf]

**Niche-induced extramedullary hematopoiesis in the spleen is regulated by the transcription factor Tlx1**

**Akihisa Oda<sup>1</sup>, Toshiki Tezuka<sup>1</sup>, Yuta Ueno<sup>1,2</sup>, Shoko Hosoda<sup>1,2</sup>, Yusuke Amemiya<sup>1,2</sup>, Chihiro Notsu<sup>1</sup>, Toru Kasahara<sup>1</sup>, Chiharu Nishiyama<sup>2</sup> and Ryo Goitsuka<sup>1,3,4,\*</sup>**

<sup>1</sup>Division of Development and Aging, Research Institute for Biomedical Sciences, Tokyo University of Science, Chiba, Japan

<sup>2</sup>Laboratory of Molecular Biology and Immunology, Department of Biological Science and Technology, Tokyo University of Science, Tokyo, Japan

<sup>3</sup>Center for Animal Disease Models, Tokyo University of Science, Chiba, Japan

<sup>4</sup>Imaging Frontier Center, Tokyo University of Science, Chiba, Japan

\*Corresponding author:

Ryo Goitsuka, Ph.D., D.V.M., Division of Development and Aging, Research Institute for Biomedical Sciences, Tokyo University of Science, 2669 Yamazaki, Noda, Chiba 278-0022, Japan; e-mail: [ryogoi@rs.noda.tus.ac.jp](mailto:ryogoi@rs.noda.tus.ac.jp)

**Key words:** Niche, hematopoietic stem/progenitor cells, spleen, mesenchymal cells

## Supplementary Figure Legends

**Fig. S1 Tlx1 is not expressed in the hematopoietic and endothelial compartment of the spleen.** Representative flow cytometry gating schemes for the stromal cell compartment and the hematopoietic and endothelial compartment of the spleen from *Tlx1<sup>CreER-Venus</sup>; R26<sup>tdTomato</sup>* mice treated with or without tamoxifen (Tx).

**Fig. S2 Effect of Tlx1 overexpression on hematopoiesis in the spleen and BM.**

*Tlx1<sup>CreER-Venus</sup>* littermate controls and *Tlx1<sup>CreER-Venus</sup>;R26<sup>Tlx1</sup>* mice (4-week-old) were treated with tamoxifen and hematopoietic cell populations in the spleen and BM were analyzed 4 weeks after the final treatment. Data were pooled from 2-4 independent experiments.

(a) Gross appearance (left), the weight (middle) and cell numbers (right) of the spleen from tamoxifen-treated *Tlx1<sup>CreER-Venus</sup>;R26<sup>Tlx1</sup>* mice (Tg), compared to the spleen from tamoxifen-treated *Tlx1<sup>CreER-Venus</sup>* littermates (Ctr). (mean±SD, n=5). (b) Total numbers of the indicated mature hematopoietic cell populations from the spleen of tamoxifen-treated *Tlx1<sup>CreER-Venus</sup>* controls (Ctr) and tamoxifen-treated *Tlx1<sup>CreER-Venus</sup>;R26<sup>Tlx1</sup>* mice (Tg). (mean ± SD; n = 6). (c) Total numbers of the indicated hematopoietic stem/progenitor cell populations from the spleen of tamoxifen-treated *Tlx1<sup>CreER-Venus</sup>* controls (Ctr) and tamoxifen-treated *Tlx1<sup>CreER-Venus</sup>;R26<sup>Tlx1</sup>* mice (Tg). (mean±SD; n = 3-6). (d) Total numbers of the indicated hematopoietic stem/progenitor cell populations in the BM of tamoxifen-treated *Tlx1<sup>CreER-Venus</sup>* controls (Ctr) and tamoxifen-treated *Tlx1<sup>CreER-Venus</sup>;R26<sup>Tlx1</sup>* mice (Tg). (mean±SD; n = 6). (e) Total numbers of the indicated mature hematopoietic cell populations in the BM of tamoxifen-treated *Tlx1<sup>CreER-Venus</sup>* controls (Ctr) and tamoxifen-treated *Tlx1<sup>CreER-Venus</sup>;R26<sup>Tlx1</sup>* mice (Tg). (mean±SD; n = 6).

**Fig. S3 Generation of the conditional *Tlx1* allele.** (a) Diagram depicting the *Tlx1*

locus and the targeting strategy used to generate mutant *Tlx1* alleles (floxed and deleted alleles). *LoxP* sites (arrowheads) were inserted into intronic sites flanking exon 1 of the

*Tlx1* gene. The FRT-flanked neomycin gene (PGK-neo) selection cassette was removed by crossing to CAG-FLPe mice. PCR primers for verifying the Cre-mediated deletion of the *loxP*-flanked fragment are indicated by arrows. DT-A, a diphtheria toxin negative selection cassette; E, *EcoRI*; S, *ScaI*. (b) The correct integration of the targeting vector was verified by Southern blot analysis of *ScaI*- or *EcoRI*-digested genomic DNA from ES cells using the indicated probe in (a). (c) Confirmation of *Tlx1* deletion. Genomic DNAs from spleen stromal cells of wild-type littermates (*Tlx1*<sup>+/+</sup>) and *Tlx1*<sup>CreER-Venus/fl</sup> mice as well as Venus<sup>+</sup> and Venus<sup>-</sup> spleen stromal cells of tamoxifen-treated *Tlx1*<sup>CreER-Venus/fl</sup> mice were subjected to PCR analysis using the indicated primer pairs in (a). The sequence of primers is as follows; 5'-TCTGTCTGTTTCGTCTTTGGG-3' for primer 1 and 5'-ACAACCTCAGAGCACGTGTG-3' for primer 2. M, DNA size marker.

**Fig. S4 Full blot image of Fig. S3b.**

**Fig. S5 Full gel image of Fig. S3c.**

Figure S1

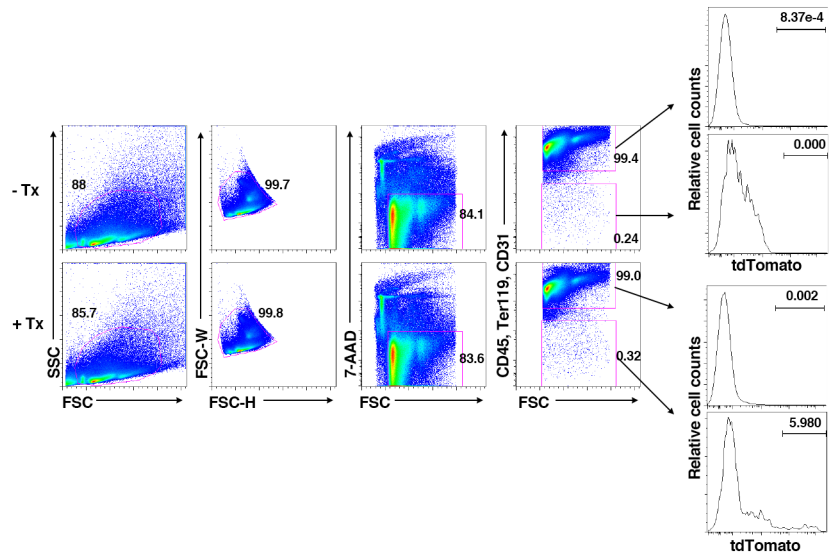

Figure S2

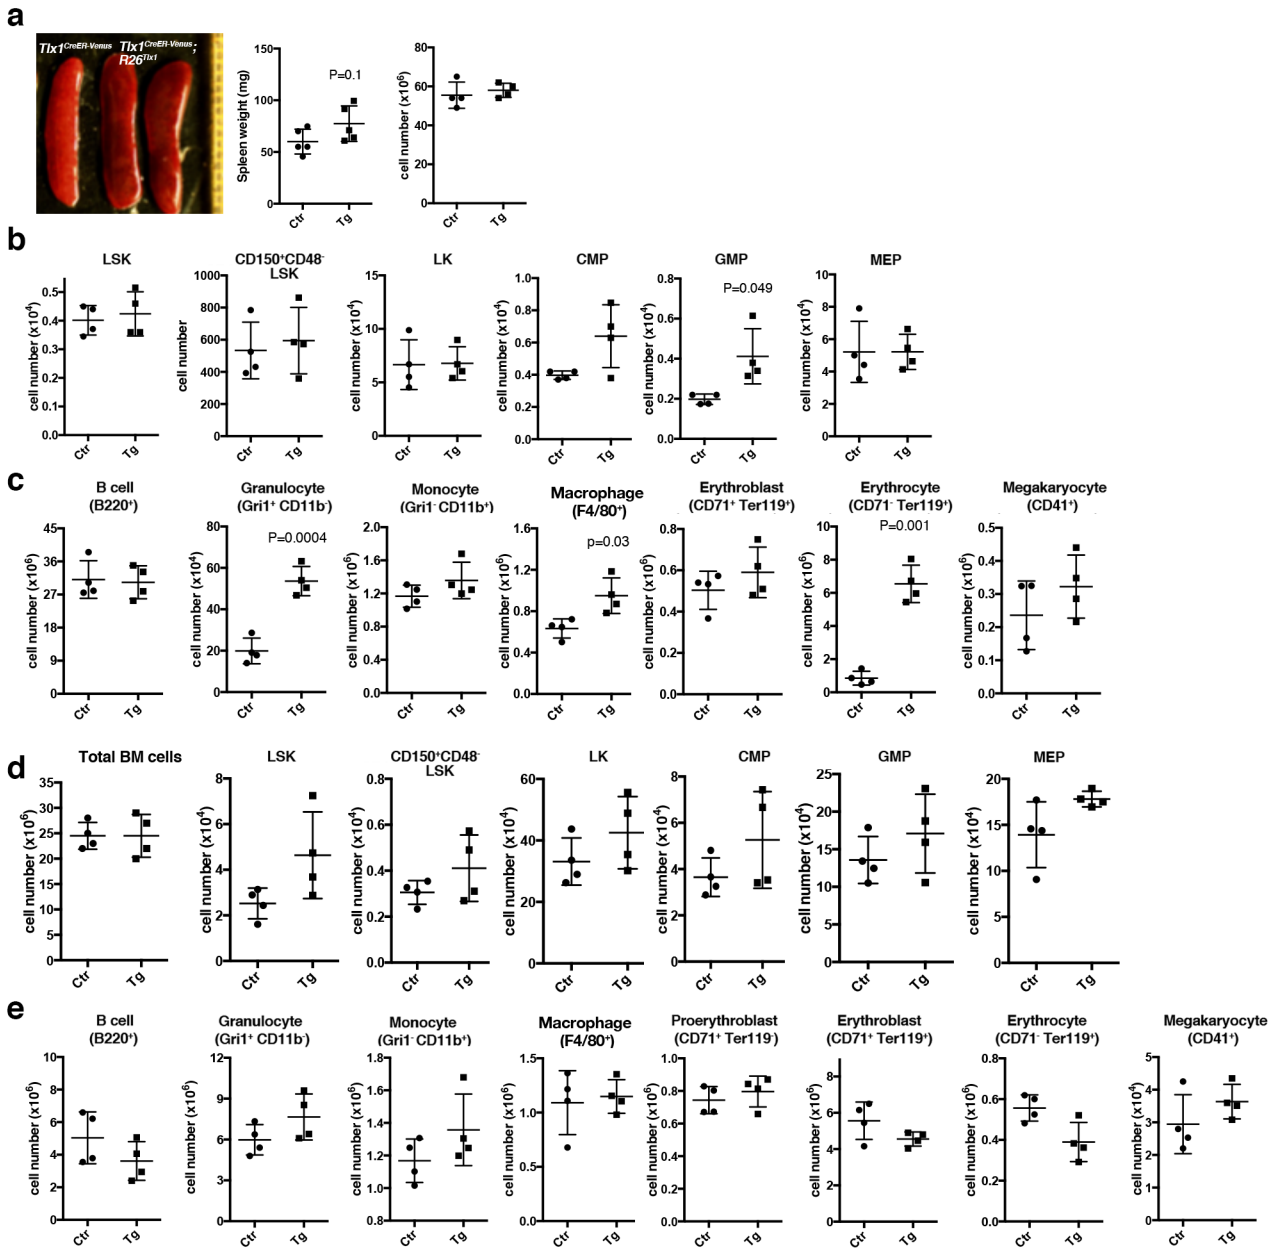

**Figure S3**

**a**

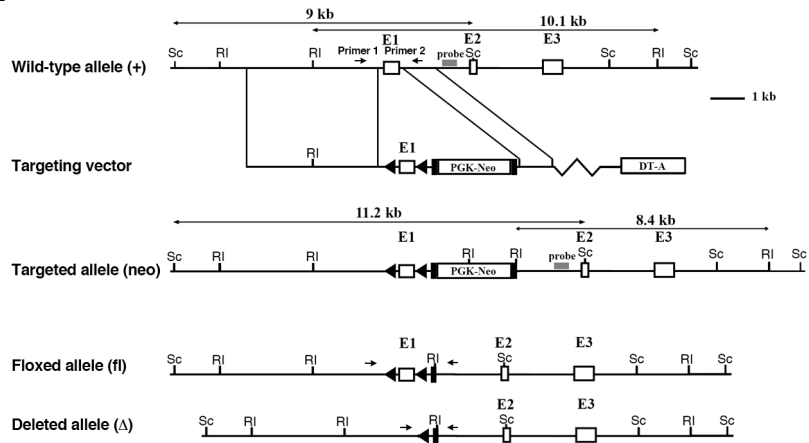

**b**

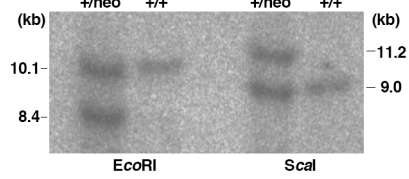

**c**

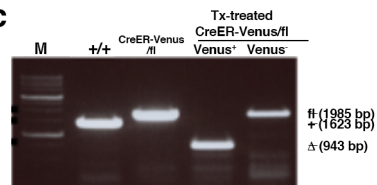

**Figure S4**

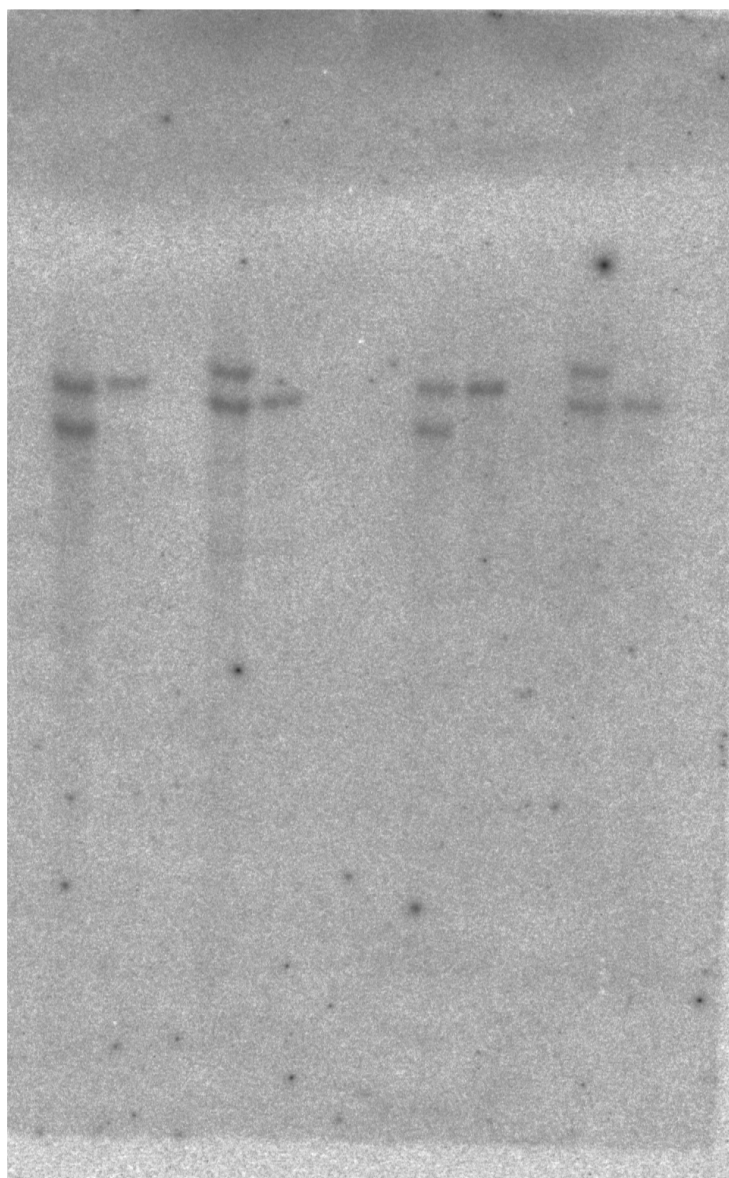

Figure S5

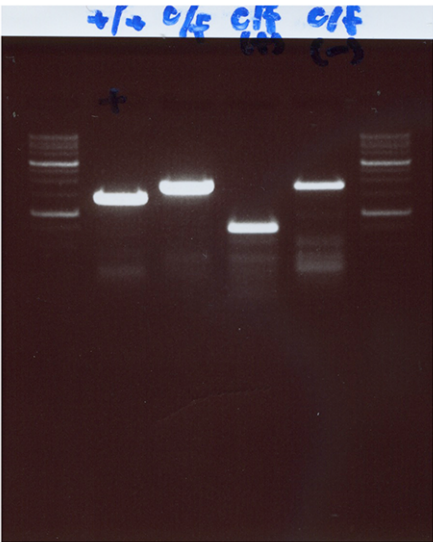



**Table S1. Antibodies used for flow cytometry**

| <b>Antibody</b> | <b>Clone</b> | <b>Conjugated</b>    | <b>Company</b>           |
|-----------------|--------------|----------------------|--------------------------|
| B220            | RA3-6B2      | PE                   | BioLegend                |
| B220            | RA3-6B2      | PerCP/Cy5.5          | BioLegend                |
| CD3e            | 145-2C11     | FITC                 | BioLegend                |
| CD3e            | 145-2C11     | PerCP/Cy5.5          | BioLegend                |
| CD11b           | M1/70        | PE                   | eBioscience              |
| CD11b           | M1/70        | PerCP/Cy5.5          | BioLegend                |
| CD16/32         | 93           | PE                   | BioLegend                |
| CD21/35         | ·7E9         | FITC                 | BioLegend                |
| CD21/35         | ·7E9         | APC                  | BioLegend                |
| CD23            | B3B4         | PE                   | BioLegend                |
| CD29            | eBioHMb1-1   | PE-Cy7               | eBioscience              |
| CD31            | 390          | Alexa647             | BioLegend                |
| CD31            | 390          | PE                   | BioLegend                |
| CD34            | RAM34        | eFluor 660           | eBioscience              |
| CD41            | MWRReg30     | PE                   | BD Biosciences           |
| CD44            | IM7          | PE-Cy7               | eBioscience              |
| CD45.2          | 104          | PerCP/Cy5.5          | BioLegend                |
| CD45.2          | 104          | Brilliant Violet 421 | BioLegend                |
| CD48            | HM48-1       | Pacific Blue         | BioLegend                |
| CD51            | RMV7         | Biotin               | BioLegend                |
| CD71            | C2           | BV421                | BD Biosciences           |
| CD71            | C2           | PerCP/Cy5.5          | BD Biosciences           |
| CD105           | MJ7/18       | Biotin               | BioLegend                |
| CD117 (c-kit)   | ACK2         | APC                  | BioLegend                |
| CD117 (c-kit)   | 2B8          | APC/Cy7              | BioLegend                |
| CD140a          | APA5         | APC                  | eBioscience              |
| CD140b          | APB5         | APC                  | BioLegend                |
| CD150           | TC15-12F12.2 | PE                   | BioLegend                |
| F4/80           | BM8          | FITC                 | eBioscience              |
| IgM             | RMM-1        | APC                  | BioLegend                |
| LeptinR         | polyclonal   | Biotin               | R&D SYSTEM               |
| LtbR            | 3C8          | Biotin               | eBioscience              |
| Ly-6G/Ly-6C     | RB6-8C5      | Pacific Blue         | BioLegend                |
| Ly-6G/Ly-6C     | RB6-8C5      | PerCP/Cy5.5          | BioLegend                |
| MAdCAM1         | MECA367      | PE                   | Santa Cruz Biotechnology |
| MAdCAM1         | MECA367      | Biotin               | BioLegend                |
| NK1.1           | PK136        | PerCP/Cy5.5          | eBioscience              |
| Podoplanin      | 8.1.1        | Biotin               | BioLegend                |
| Sca-1           | D7           | FITC                 | eBioscience              |
| TCR $\beta$     | H57-597      | FITC                 | BioLegend                |
| Ter119          | TER-119      | APC                  | BioLegend                |
| Ter119          | TER-119      | PerCP/Cy5.5          | BioLegend                |
| Ter119          | TER-119      | Pacific Blue         | BioLegend                |
| VCAM1           | 429          | Alexa Fluor 647      | BioLegend                |
| VEGFR2          | Avas12       | APC                  | BioLegend                |
| Arm Ham IgG     | eBio299Arm   | PE-Cy7               | eBioscience              |
| Arm Ham IgG     | HTK888       | Biotin               | BioLegend                |
| Syrian Ham IgG  | SHG-1        | Biotin               | BioLegend                |
| Goat IgG        | ab37376      | Biotin               | abcam                    |
| Rat IgG2a       | 17-4321      | APC                  | eBioscience              |
| Rat IgG2a       | RTK2758      | Biotin               | BioLegend                |
| Rat IgG2a       | sc-2872      | PE                   | Santa Cruz Biotechnology |
| Rat IgG1        | RTK2071      | Biotin               | BioLegend                |
| Streptavidin    |              | APC                  | eBioscience              |
| Streptavidin    |              | eFluor 450           | eBioscience              |

**Table S2. Antibodies used for immunohistochemical analysis**

| <b>Antibody</b> | <b>Clone</b>      | <b>Conjugated</b> | <b>Company</b> |
|-----------------|-------------------|-------------------|----------------|
| GFP             | Rabbit polyclonal | Purified          | MBL            |
| Rabbit IgG      | Donkey polyclonal | Alexa Fluor 488   | Thermo Fisher  |
| Rabbit IgG      | Goat polyclonal   | Alexa Fluor 647   | Cell signaling |
| CD3ε            | 145-2C11          | PE                | BioLegend      |
| CD3ε            | 145-2C11          | APC               | BioLegend      |
| CD3ε            | 145-2C11          | Biotin            | BioLegend      |
| B220            | RA3-6B2           | PE                | BioLegend      |
| B220            | RA3-6B2           | APC               | BioLegend      |
| B220            | RA3-6B2           | Biotin            | BioLegend      |
| Podoplanin      | 8.1.1             | Biotin            | BioLegend      |
| MAdCAM1         | MECA367           | Biotin            | BioLegend      |
| CD21/35         | •7E9              | Biotin            | BioLegend      |
| ERTR7           | ER-TR7            | Purified          | abcam          |
| CD31            | 390               | Alexa647          | BioLegend      |
| aSMA            | 1A4               | Cy3               | SIGMA          |
| CD71            | C2                | Biotin            | BD Bioscience  |
| F4/80           | BM8               | Biotin            | BioLegend      |
| FDCM1           | FDCM1             | Purified          | BD Bioscience  |
| CD41            | MWRReg30          | Alexa Fluor 488   | BioLegend      |
| CD150           | TC15-12F12.2      | PE                | BioLegend      |
| Ter119          | Ter119            | Biotin            | BioLegend      |
| CD11b           | M1/70             | Biotin            | BioLegend      |
| NK1.1           | PK136             | Biotin            | BioLegend      |
| Gr1             | RB6-8C5           | Biotin            | eBioscience    |
| Streptavidin    |                   | Alexa Fluor 488   | Thermo Fisher  |
| Streptavidin    |                   | Alexa Fluor 548   | Thermo Fisher  |
| Streptavidin    |                   | Alexa Fluor 633   | Thermo Fisher  |

**Table S3. Primers used for real-time PCR**

---

|                   |                              |
|-------------------|------------------------------|
| $\beta$ -actin-s  | 5'-GGCTGTATTCCCCTCCATCG-3'   |
| $\beta$ -actin-as | 5'-CCAGTTGGTAACAATGCCATGT-3' |
| SCF-s             | 5'-TCTGCGGGAATCCTGTGACT-3'   |
| SCF-as            | 5'-CGGCGACATAGTTGAGGGTTAT-3' |
| M-CSF-s           | 5'-GAGGTGTCAGAACACTGTAG-3'   |
| M-CSF-as          | 5'-CAATCTGGCATGAAGTCTCC-3'   |
| BMP4-s            | 5'-TTCCTGGTAACCGAATGCTGA-3'  |
| BMP4-as           | 5'-CCTGAATCTCGGCGACTTTTT-3'  |
| CXCL12-s          | 5'-GCTCTGCATCAGTGACGGTA-3'   |
| CXCL12-as         | 5'-TAATTTTCGGGTCAATGCACA-3'  |
| mTlx1 Ex-s        | 5'-CGCAGATACACAAAGGACAG-3'   |
| mTlx1 Ex-as       | 5'-TTTCCAGCTCACAGATCTGC-3'   |
